# Supplementary material
Source: PubMed Central journal article supplement (PMC2427248)
Supplement: mmc1.pdf [file mmc1.pdf]

## Supplemental Data

### Two *CES1* Gene Mutations Lead to Dysfunctional

### Carboxylesterase 1 Activity in Man:

### Clinical Significance and Molecular Basis

Hao-Jie Zhu, Kennerly S. Patrick, Hong-Jie Yuan, Jun-Sheng Wang, Jennifer L. Donovan, C. Lindsay DeVane, Robert Malcolm, Julie A. Johnson, Geri L. Youngblood, Douglas H. Sweet, Taimour Y. Langaee, and John S. Markowitz

Figure S1. The Major Metabolic Pathway of Racemic MPH in Humans

Figure S1

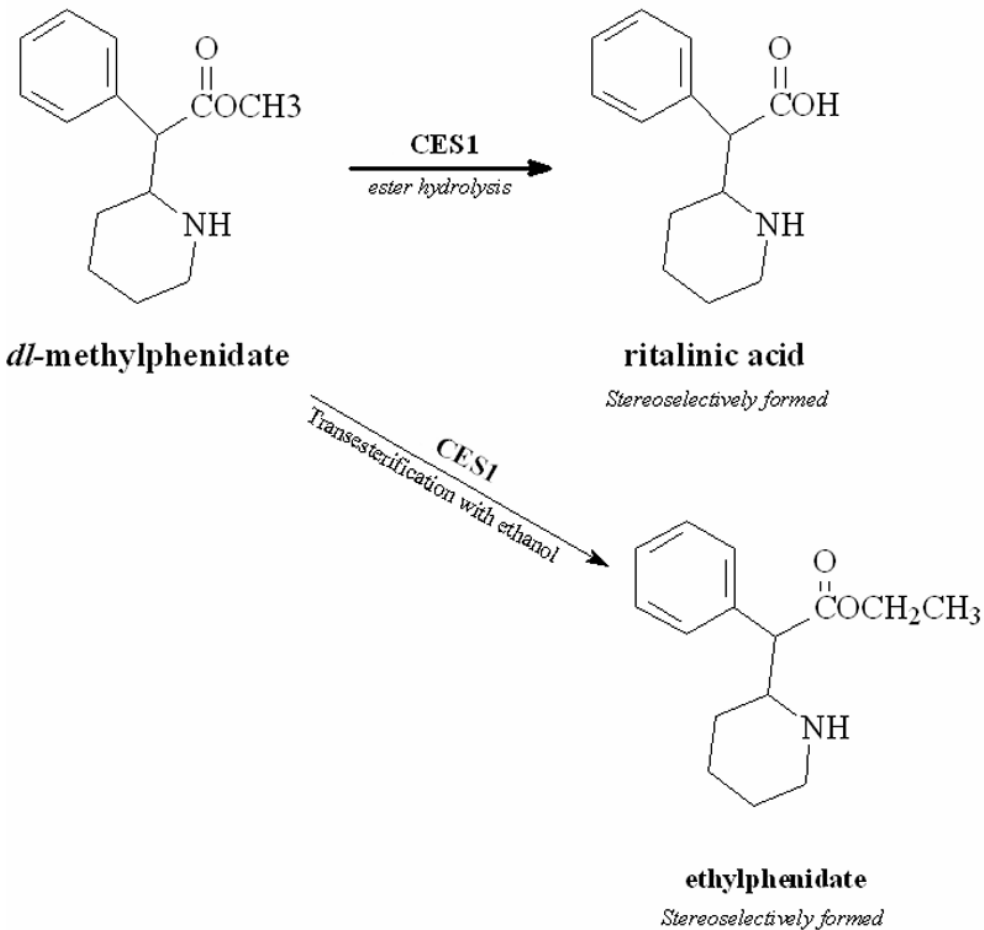

Figure S2.

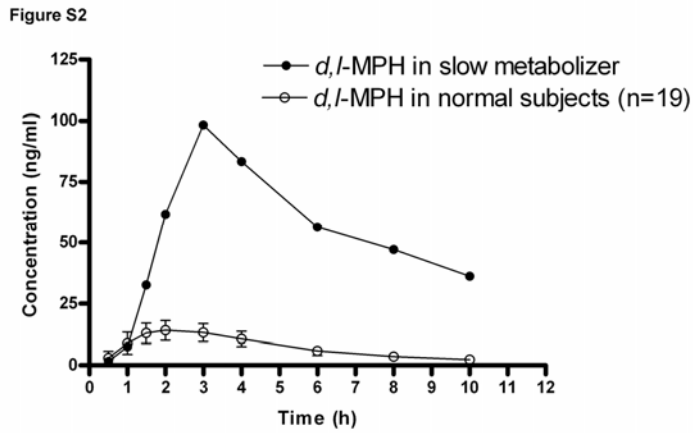

The plasma concentration versus time curve of total (*d*-MPH and *l*-MPH) concentrations of MPH in an apparent aberrant metabolizer compared to a similar plot of mean isomer concentrations from 19 study peers following a single 0.3 mg/kg dose of racemic MPH.

Figure S3. Alignment of the Predicted Protein Sequences of WT CES1 and the Two Mutations Identified in the Aberrant Metabolizer

Figure S3

```

50
wildtype   MWLRAFILATLSASAAGHPSSPPVVDTVHGKVLGKFVSLEGFAQPVAIF
p.Gly143Glu MWLRAFILATLSASAAGHPSSPPVVDTVHGKVLGKFVSLEGFAQPVAIF
p.Asp260fs MWLRAFILATLSASAAGHPSSPPVVDTVHGKVLGKFVSLEGFAQPVAIF

100
wildtype   LGIPFAKPPLGPLRFTPPQPAEPWSFVKNATSYPMPCTQDPKAGQLLSEL
p.Gly143Glu LGIPFAKPPLGPLRFTPPQPAEPWSFVKNATSYPMPCTQDPKAGQLLSEL
p.Asp260fs LGIPFAKPPLGPLRFTPPQPAEPWSFVKNATSYPMPCTQDPKAGQLLSEL

150
wildtype   FTNRKENIPLKLSEDCLYLNIYTPADLTTKNRLPVMVWIHGGGLMVGAAS
p.Gly143Glu FTNRKENIPLKLSEDCLYLNIYTPADLTTKNRLPVMVWIHGGELMVGAAS
p.Asp260fs FTNRKENIPLKLSEDCLYLNIYTPADLTTKNRLPVMVWIHGGGLMVGAAS

200
wildtype   TYDGLALAAHENVVVVVTIQYRLGIWGFFSTGDEHSRGNWGHLDQVAALRW
p.Gly143Glu TYDGLALAAHENVVVVVTIQYRLGIWGFFSTGDEHSRGNWGHLDQVAALRW
p.Asp260fs TYDGLALAAHENVVVVVTIQYRLGIWGFFSTGDEHSRGNWGHLDQVAALRW

250
wildtype   VQDNIASFGGNPGSVTIFGSAGGESVSVLVLSPLAKNLFHRAISEGVA
p.Gly143Glu VQDNIASFGGNPGSVTIFGSAGGESVSVLVLSPLAKNLFHRAISEGVA
p.Asp260fs VQDNIASFGGNPGSVTIFGSAGGESVSVLVLSPLAKNLFHRAISEGVA

300
wildtype   LTSVLVKKGDVKPLAEQIAITAGCKTTTSAVMVHCLRQKTEEELETTLK
p.Gly143Glu LTSVLVKKGDVKPLAEQIAITAGCKTTTSAVMVHCLRQKTEEELETTLK
p.Asp260fs LTSVLVKKGESSPWLSKLLSLLGAKPPPLLSWFTACDRRRKRSWRRH*

350
wildtype   MKFLSLDLQGDPRESQPLLGTVIDGMLLLKTPEELQAERNFHTVPYVMGI
p.Gly143Glu MKFLSLDLQGDPRESQPLLGTVIDGMLLLKTPEELQAERNFHTVPYVMGI

400
wildtype   NKQEFGWLIPMQLMSYPLSEGQLDQKTAMSLLLWKSYPLVCIAKELIPEAT
p.Gly143Glu NKQEFGWLIPMQLMSYPLSEGQLDQKTAMSLLLWKSYPLVCIAKELIPEAT

450
wildtype   EKYLGGTDDTVKKKDLFLDLIADVMFGVPSVIVARNHRDAGAPTYMYEFQ
p.Gly143Glu EKYLGGTDDTVKKKDLFLDLIADVMFGVPSVIVARNHRDAGAPTYMYEFQ

500
wildtype   YRPSFSSDMKPKTVIGDHGDELFSVFGAPFLKEGASEEEIRLSKMVMKFW
p.Gly143Glu YRPSFSSDMKPKTVIGDHGDELFSVFGAPFLKEGASEEEIRLSKMVMKFW

550
wildtype   ANFARNGNPNGEGLPHWPEYNQKEGYLQIGANTQAAQKLKDKEVAFWTNL
p.Gly143Glu ANFARNGNPNGEGLPHWPEYNQKEGYLQIGANTQAAQKLKDKEVAFWTNL

567
wildtype   FAKKAVEKPPQTEHIEL*
p.Gly143Glu FAKKAVEKPPQTEHIEL*

```

p.Gly143Glu is the Gly143Glu substitution and is denoted by the boxed amino acid. p.Asp260fs is the Asp260Glu frameshift mutation and the altered amino acid sequence is underlined. The amino acids of the catalytic triad are bolded, the residues of the oxyanion hole are indicated by the symbol ‘ø’, and \* designates a stop codon.

Table S1. Pharmacokinetic Parameters in the Slow Metabolizer versus the 19 Study Peers

| <i>Pharmacokinetic Parameter</i> | <i>Mean (±SD)</i> | <i>Outlier</i> | <i>ESD Statistic</i> | <i>p Value</i> |
|----------------------------------|-------------------|----------------|----------------------|----------------|
| <b>AUC (ng/ml · hr)</b>          | 78.6 (35.7)       | 208.7          | 3.6                  | < 0.01         |
| <b>C<sub>max</sub> (ng/ml)</b>   | 13.8 (3.2)        | 36.7           | 7.3                  | < 0.01         |
| <b>t<sub>1/2</sub> (hr)</b>      | 3.0 (0.7)         | 5.4            | 3.3                  | < 0.01         |

Table S2. Minor Allele Frequencies of *CES1* SNP p.Gly143Glu

|               | <i>Caucasian</i> | <i>Black</i>    | <i>Hispanic</i> | <i>Asian</i>    | <i>Total</i>    |
|---------------|------------------|-----------------|-----------------|-----------------|-----------------|
| <b>GA</b>     | n = 34 (7.5%)    | n = 10 (8.5%)   | n = 12 (4.0%)   | n = 0 (0.0%)    | n = 56 (6.0%)   |
| <b>GG</b>     | n = 421 (92.5%)  | n = 107 (91.5%) | n = 287 (96.0%) | n = 54 (100.0%) | n = 869 (94.0%) |
| <b>MAF</b>    | C = 3.7%         | C = 4.3%        | C = 2.0%        | C = 0%          | C = 3.0%        |
| <b>Totals</b> | 455              | 117             | 299             | 54              | 925             |

\* The 95% confidence interval of average minor allele frequencies (MAF) from four tested populations is - 0.57% ~5.57%
